# Supplementary material for: Functional MRI of imprinting memory in awake newborn domestic chicks
Source: PubMed Central journal article supplement (PMC11480507; doi:10.1038/s42003-024-06991-z), 2024-10-15
Supplement: 42003_2024_6991_MOESM3_ESM.pdf [file 42003_2024_6991_MOESM3_ESM.pdf]

## **Description Of Additional Supplementary File**

**File name:** Supplementary Data 1

**Description:** The source data underlying Supplementary Figure 2.
